# Supplementary material
Source: PubMed Central journal article supplement (PMC3808614)
Supplement: 1313759110_pnas.201313759SI.pdf [file 1313759110_pnas.201313759SI.pdf]

# Supporting Information

Assis and Bachtrog 10.1073/pnas.1313759110

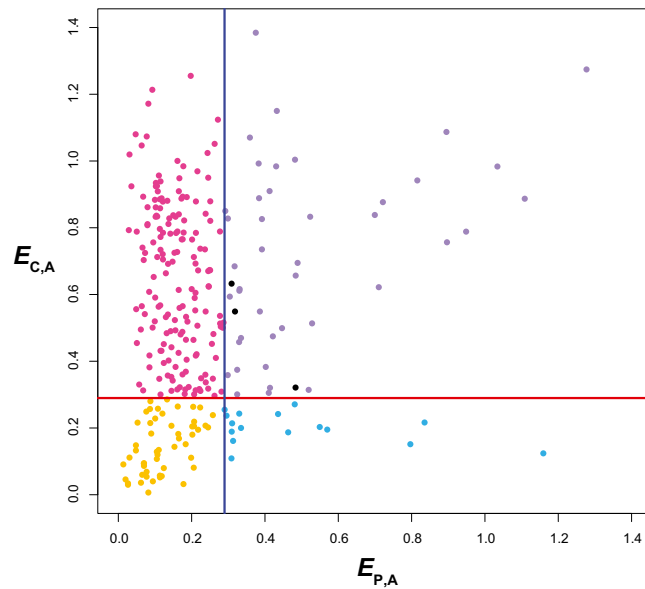

**Fig. S1.** Classification of evolutionary processes maintaining individual pairs of duplicate genes. Euclidian distances between expression profiles of parent and ancestral copies ( $E_{P,A}$ ) is plotted against Euclidian distances between expression profiles of child and ancestral copies ( $E_{C,A}$ ) for all duplicates, which are colored by class (yellow, conservation; blue, neofunctionalization of parent copy; pink, neofunctionalization of child copy; black, subfunctionalization; purple, specialization). The cutoff used to define gene expression divergence is represented by a vertical blue line for  $E_{P,A}$  and by a horizontal red line for  $E_{C,A}$ .

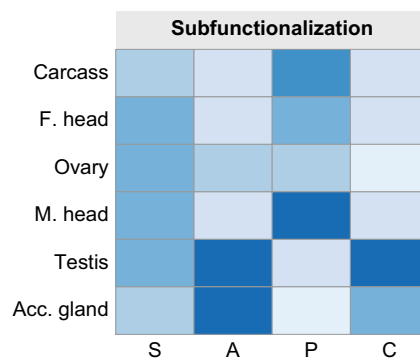

**Fig. S2.** Relative expression patterns of the three duplicate gene pairs classified as subfunctionalized. Mean relative expression levels in six tissues of single-copy (S), ancestral (A), parent (P), and child (C) genes. Relative expression ranges from 0% to 46%, with darker colors indicating higher values.

**Table S1. Classifications resulting from application of various cutoffs to Euclidian distances**

| Cutoff                                              | Value | Conservation | Neofunctionalization<br>of parent copy | Neofunctionalization<br>of child copy | Subfunctionalization | Specialization |
|-----------------------------------------------------|-------|--------------|----------------------------------------|---------------------------------------|----------------------|----------------|
| Mean                                                | 0.262 | 49           | 15                                     | 160                                   | 7                    | 50             |
| Mean + standard deviation                           | 0.482 | 119          | 7                                      | 141                                   | 0                    | 14             |
| Median                                              | 0.194 | 30           | 9                                      | 127                                   | 12                   | 103            |
| Median + median absolute<br>deviation, $c = 0.303$  | 0.219 | 40           | 13                                     | 143                                   | 10                   | 75             |
| Median + median absolute<br>deviation, $c = 1$      | 0.279 | 51           | 16                                     | 165                                   | 5                    | 44             |
| Median + median absolute<br>deviation, $c = 1.4826$ | 0.320 | 72           | 13                                     | 161                                   | 2                    | 33             |
| Median + semi-interquartile<br>range                | 0.290 | 53           | 16                                     | 167                                   | 4                    | 41             |
| 55% quantile                                        | 0.211 | 36           | 12                                     | 138                                   | 13                   | 82             |
| 60% quantile                                        | 0.230 | 41           | 13                                     | 147                                   | 10                   | 70             |
| 70% quantile                                        | 0.279 | 51           | 16                                     | 165                                   | 5                    | 44             |
| 75% quantile                                        | 0.313 | 68           | 12                                     | 163                                   | 2                    | 36             |

**Table S2. Classification of evolutionary processes maintaining *Drosophila melanogaster* duplicate genes that arose after different evolutionary divergence times**

| Divergence time                                             | Conservation | Neofunctionalization<br>of parent copy | Neofunctionalization<br>of child copy | Subfunctionalization | Specialization | <i>P</i> |
|-------------------------------------------------------------|--------------|----------------------------------------|---------------------------------------|----------------------|----------------|----------|
| <i>Drosophila simulans</i> /<br><i>Drosophila sechellia</i> | 2 (3)        | 2 (1.33)                               | 12 (10.17)                            | 0 (0.17)             | 2 (3.33)       | 0.7905   |
| <i>Drosophila yakuba</i> /<br><i>Drosophila erecta</i>      | 0 (1.67)     | 0 (0.74)                               | 9 (5.65)                              | 0 (0.09)             | 1 (1.85)       | 0.3002   |
| <i>Drosophila ananassae</i>                                 | 9 (8.50)     | 5 (3.78)                               | 26 (28.81)                            | 0 (0.47)             | 11 (9.44)      | 0.8398   |
| <i>Drosophila pseudoobscura</i>                             | 7 (4.83)     | 1 (2.15)                               | 14 (16.38)                            | 1 (0.27)             | 6 (5.37)       | 0.4082   |

Divergence times are listed from most to least recent. Expectations are shown in parentheses.

**Table S3. Classification of evolutionary processes maintaining *D. pseudoobscura* duplicate genes that arose after different evolutionary divergence times**

| Divergence time                     | Conservation | Neofunctionalization<br>of parent copy | Neofunctionalization<br>of<br>child copy | Subfunctionalization | Specialization | <i>P</i> |
|-------------------------------------|--------------|----------------------------------------|------------------------------------------|----------------------|----------------|----------|
| <i>Drosophila persimilis</i>        | 16 (12.34)   | 3 (2.82)                               | 34 (37.38)                               | 2 (0.71)             | 6 (7.76)       | 0.3858   |
| <i>D. ananassae</i>                 | 11 (16.39)   | 2 (3.75)                               | 55 (49.63)                               | 0 (0.94)             | 13 (10.30)     | 0.3071   |
| <i>D. yakuba</i> / <i>D. erecta</i> | 1 (1.42)     | 2 (0.32)                               | 4 (4.29)                                 | 0 (0.08)             | 0 (0.89)       | NC       |
| <i>D. melanogaster</i>              | 7 (4.86)     | 1 (1.11)                               | 13 (14.71)                               | 0 (0.89)             | 3 (3.05)       | 0.8402   |

Divergence times are listed from most to least recent. Expectations are shown in parentheses. NC, not calculated because expectations were all less than five.

**Table S4. Rules for classifying evolutionary processes by divergence in gene expression localization patterns**

| Classification                      | $D_{P,A}$ | $D_{C,A}$ | $D_{P+C,A}$ |
|-------------------------------------|-----------|-----------|-------------|
| Conservation                        | 0         | 0         | —           |
| Neofunctionalization of parent copy | 1         | 0         | —           |
| Neofunctionalization of child copy  | 0         | 1         | —           |
| Subfunctionalization                | 1         | 1         | 0           |
| Specialization                      | 1         | 1         | 1           |

$D_{P,A}$ , divergence between expression localization patterns of parent and ancestral copies;  $D_{C,A}$ , divergence between expression localization patterns of child and ancestral copies;  $D_{P+C,A}$ , divergence between the combined parent-child expression localization patterns and those of the ancestral copy.
